# Supplementary material for: Organic Remains in Early Christian Egyptian Metal Vessels: Investigation with Fourier Transform Infrared Spectroscopy and Gas Chromatography–Mass Spectrometry
Source: MDPI journal article supplement (doi:10.3390/heritage4040199), 2021-10-18
Supplement: s1 [file s1]

## Supplementary Information:

# Organic Remains in Early Christian Egyptian Metal Vessels: Investigation with Fourier Transform Infrared Spectroscopy and Gas Chromatography–Mass Spectrometry

Kyriaki Koupadi <sup>1</sup>, Stamatis C. Boyatzis <sup>1,\*</sup>, Maria Roumpou <sup>2</sup>, Nick Kalogeropoulos <sup>2</sup>, and Despoina Kotzamani <sup>3</sup>

<sup>1</sup> Department of Conservation of Antiquities & Works of Art, University of West Attica, Aghiou Spyridonos, 12210 Egaleo, Greece; koupadirk@gmail.com

<sup>2</sup> Department of Nutrition and Dietetics, Harokopio University of Athens, El. Venizelou 70, 17671 Athens, Greece; mroumpou@gmail.com (M.R.); nickal@hua.gr (N.K.)

<sup>3</sup> Metals, Glass and Organic Material Conservation Lab, Benaki Museum, Koubari 1, 10674 Athens, Greece; kotzamani@benaki.org

\* Correspondence: sboyatzis@uniwa.gr

**Citation:** Koupadi, K.; Boyatzis, S.C.; Roumpou, M.; Kalogeropoulos, N.; Kotzamani, D. Organic Remains in Early Christian Egyptian Metal Vessels: Investigation with Fourier Transform Infrared Spectroscopy and Gas Chromatography–Mass Spectrometry. *Heritage* **2021**, *4*, 3611–3629. <https://doi.org/10.3390/heritage4040199>

Academic Editor: Nick Schiavon

Received: 31 August 2021

Accepted: 7 October 2021

Published: 18 October 2021

**Publisher’s Note:** MDPI stays neutral with regard to jurisdictional claims in published maps and institutional affiliations.

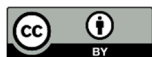

**Copyright:** © 2021 by the authors. Licensee MDPI, Basel, Switzerland. This article is an open access article distributed under the terms and conditions of the Creative Commons Attribution (CC BY) license (<http://creativecommons.org/licenses/by/4.0/>).

## 1. Infrared spectra (Figures S1–S4)

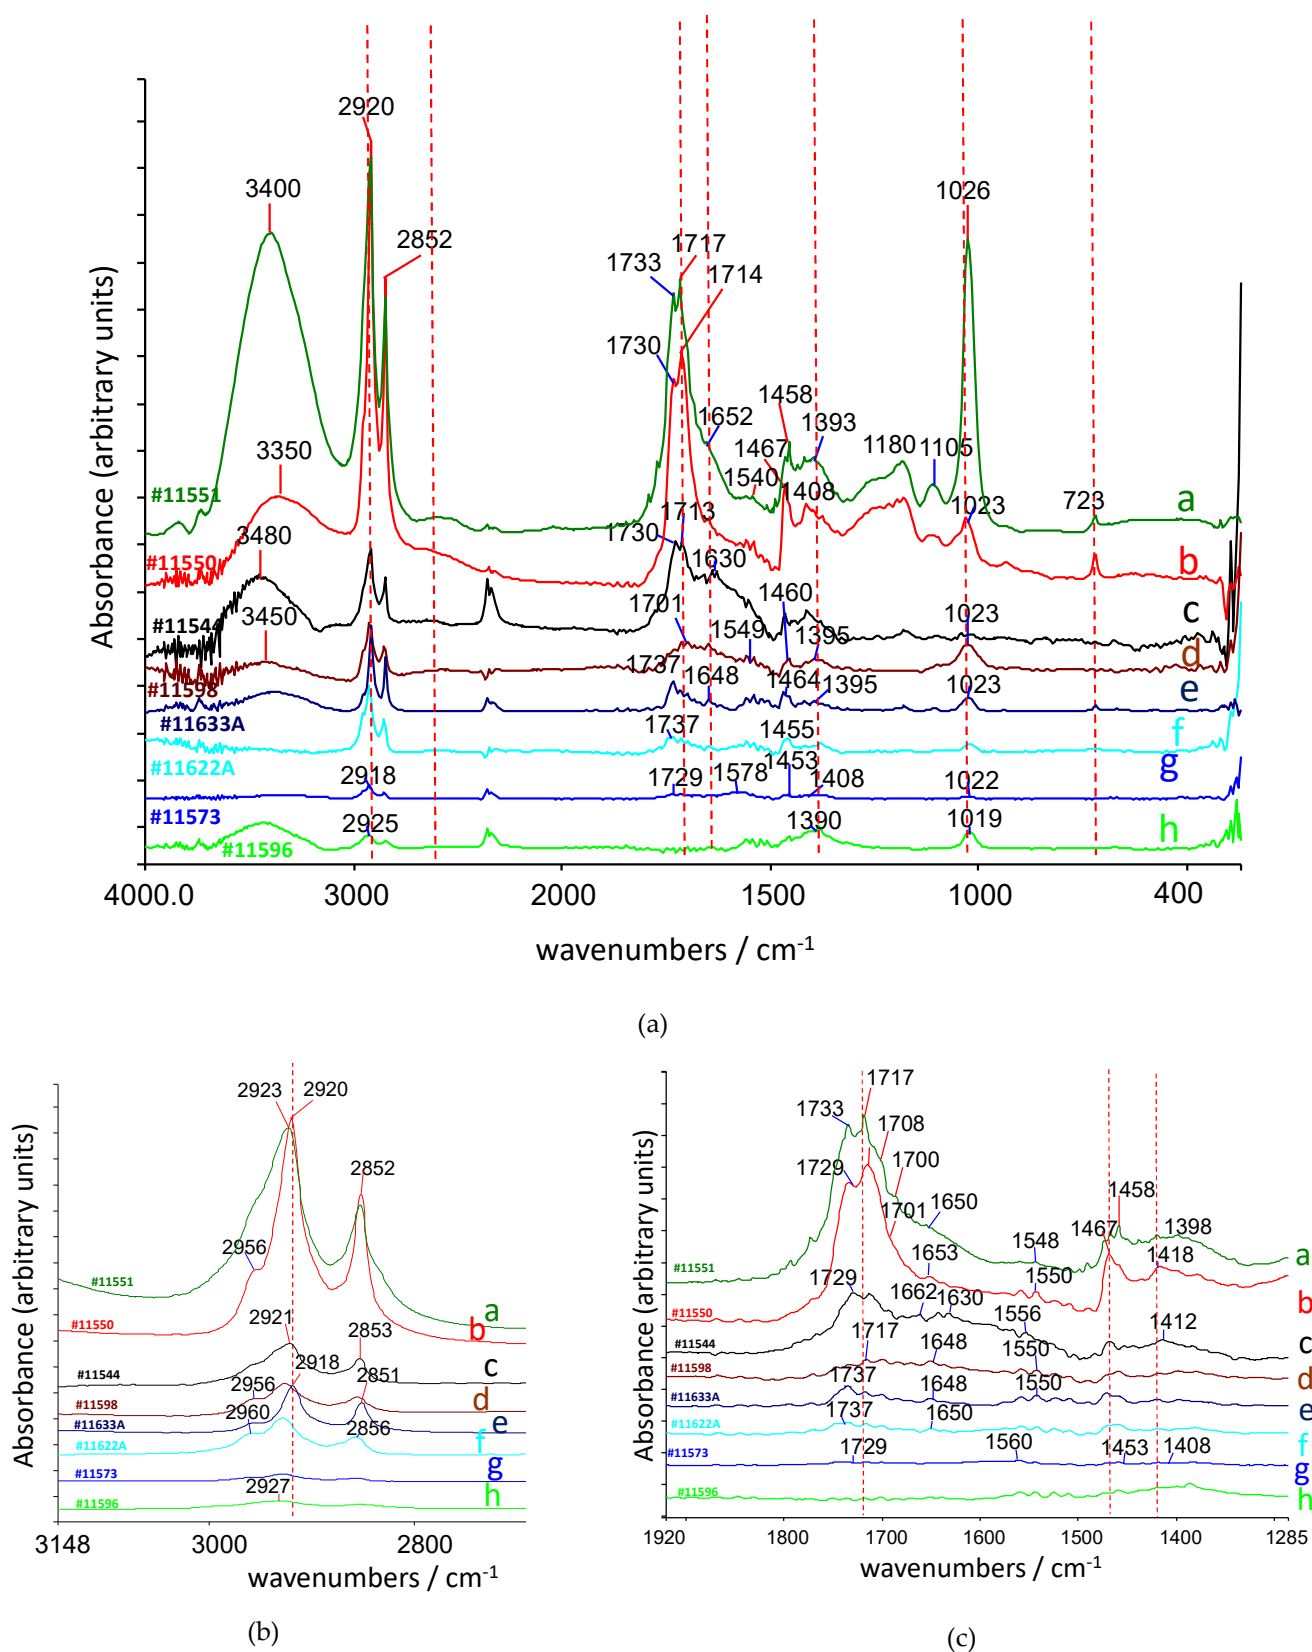

**Figure S1.** Infrared spectra of samples extracted from methanol. Intensities of spectra reflect relative quantities of their components; (a) full spectrum, (b) C-H stretching region, and (c) carbonyl stretch and C-H deformation region.

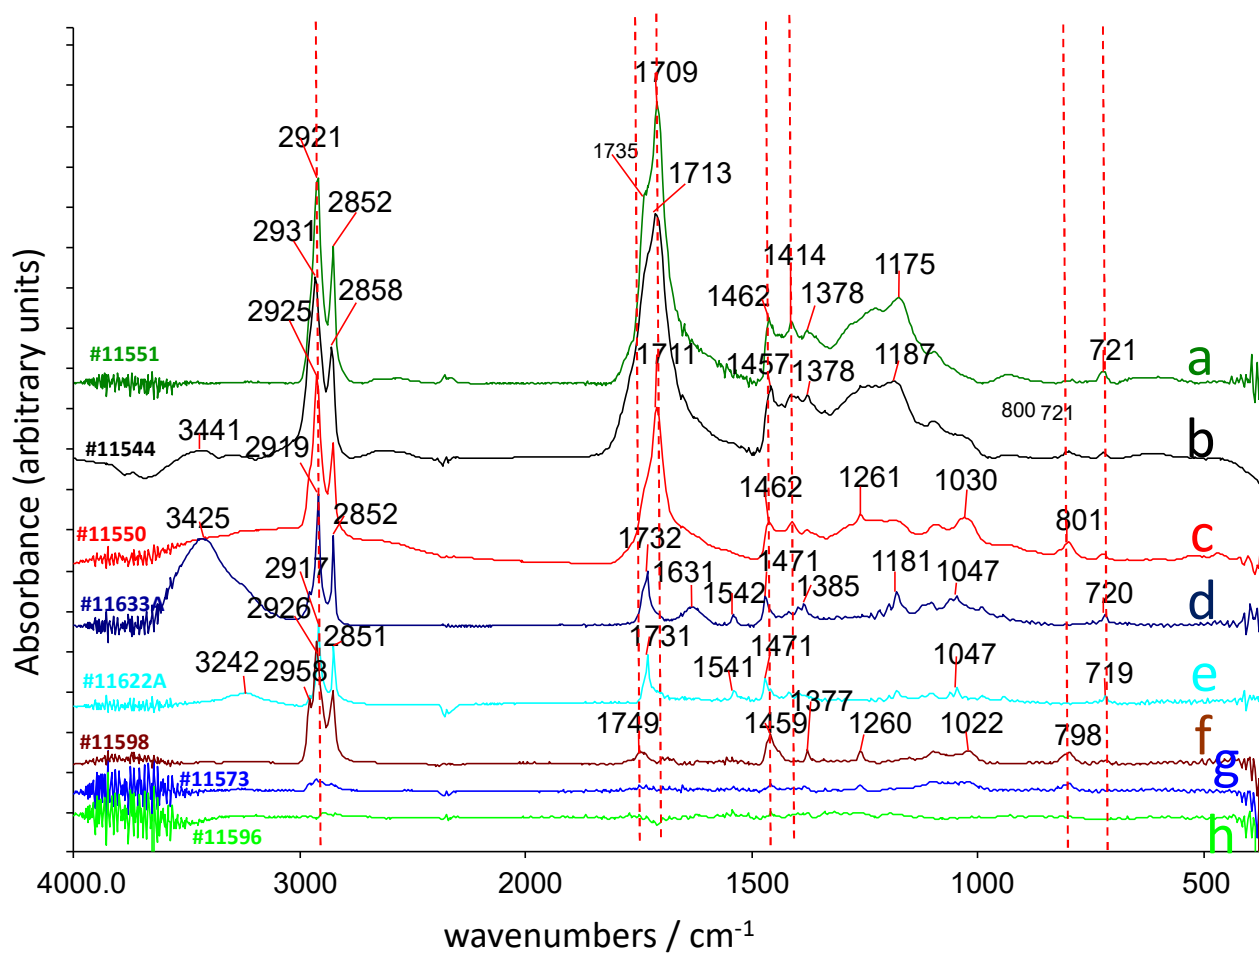

(a)

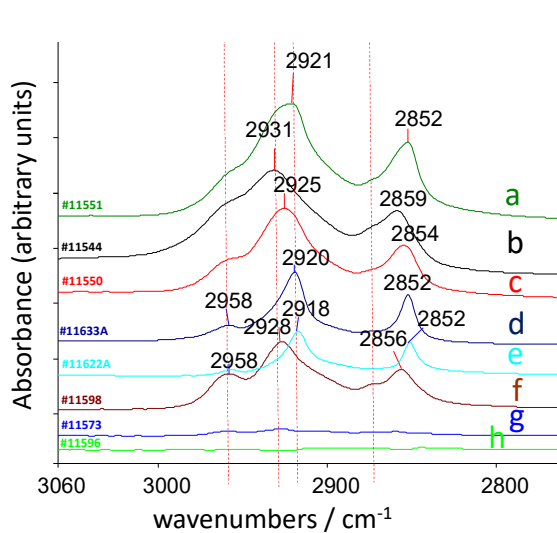

(b)

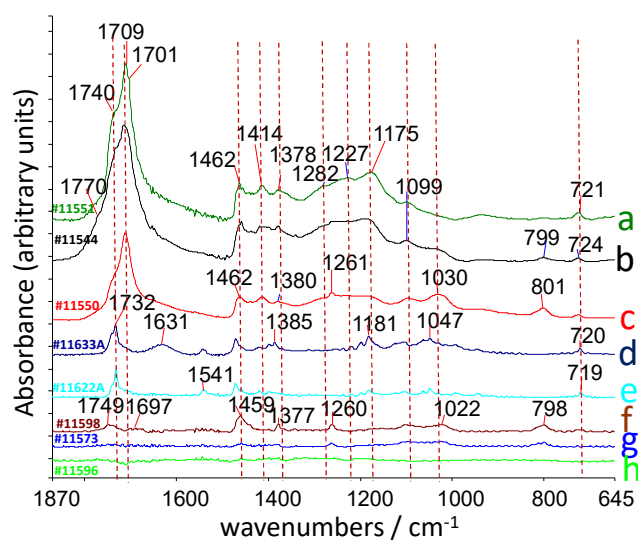

(c)

**Figure S2.** Infrared spectra of samples extracted from acetone. Intensities of spectra reflect relative quantities of their components; (a) full spectrum, (b) C-H stretching region, and (c) carbonyl stretch and C-H deformation region.

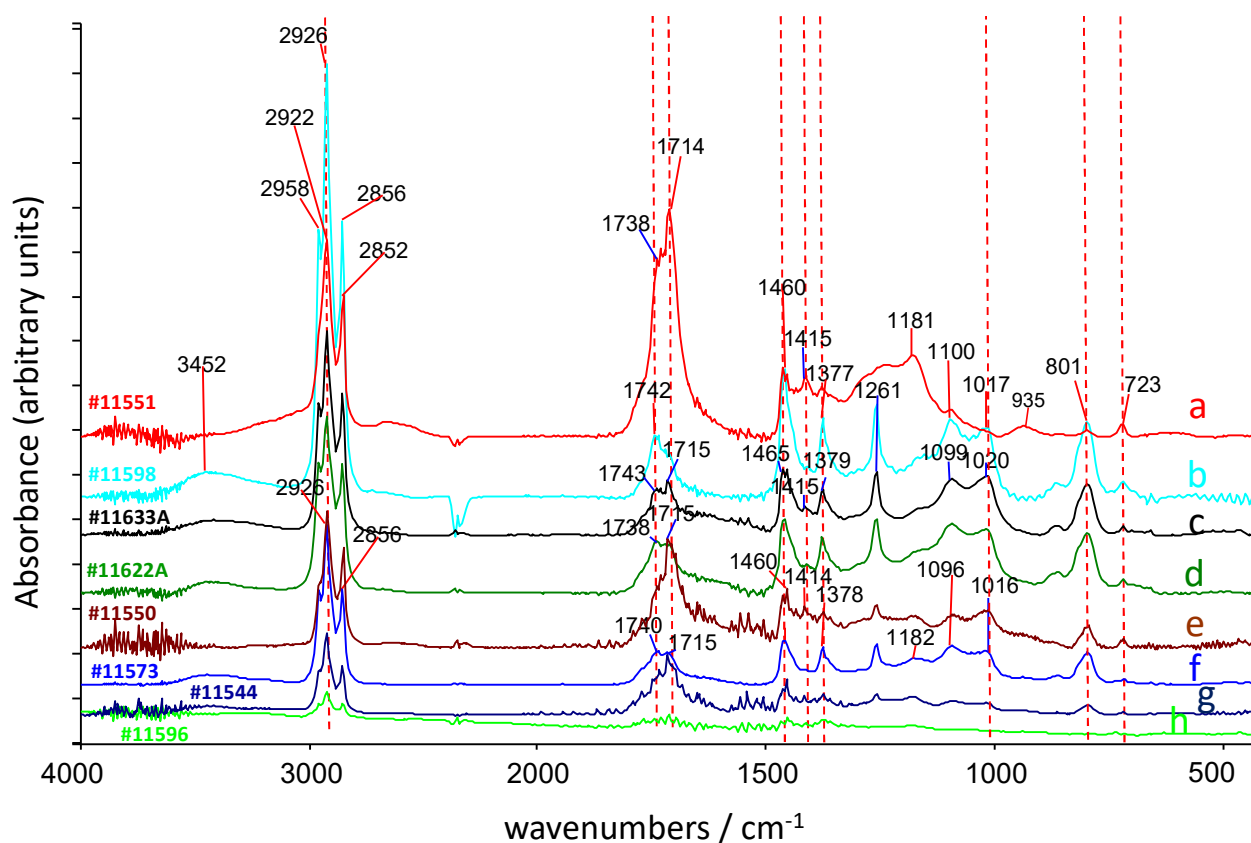

(a)

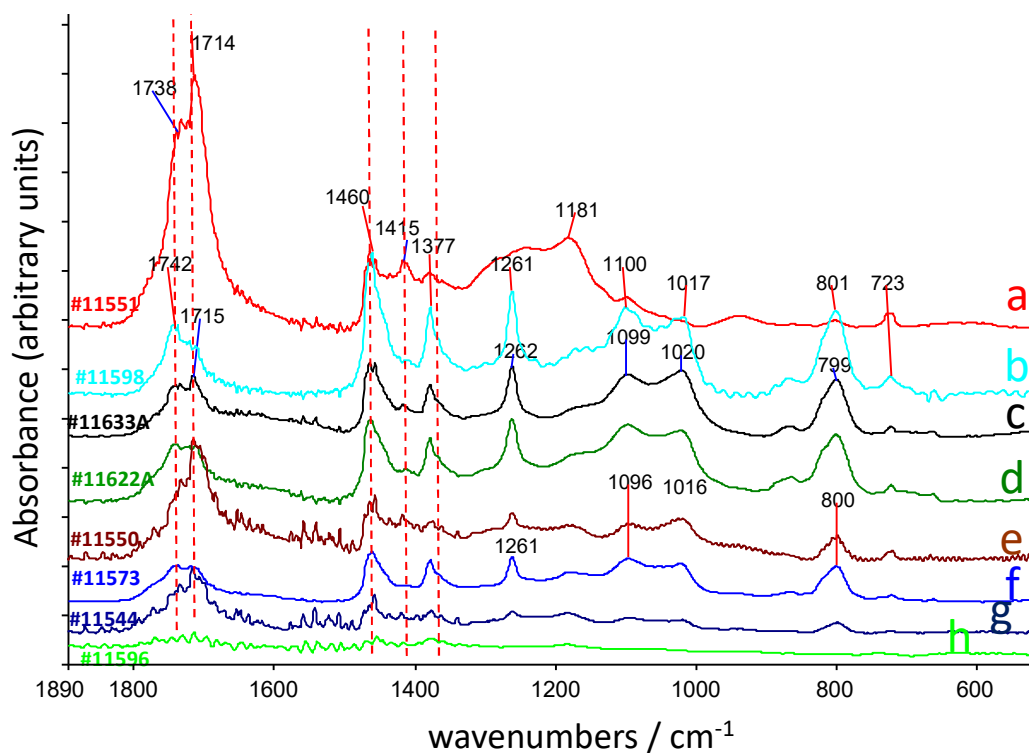

(b)

**Figure S3.** Infrared spectra of samples extracted from dichloromethane. Intensities of spectra reflect relative quantities of their components; (a) full spectrum, and (b) carbonyl stretch and C-H deformation region.

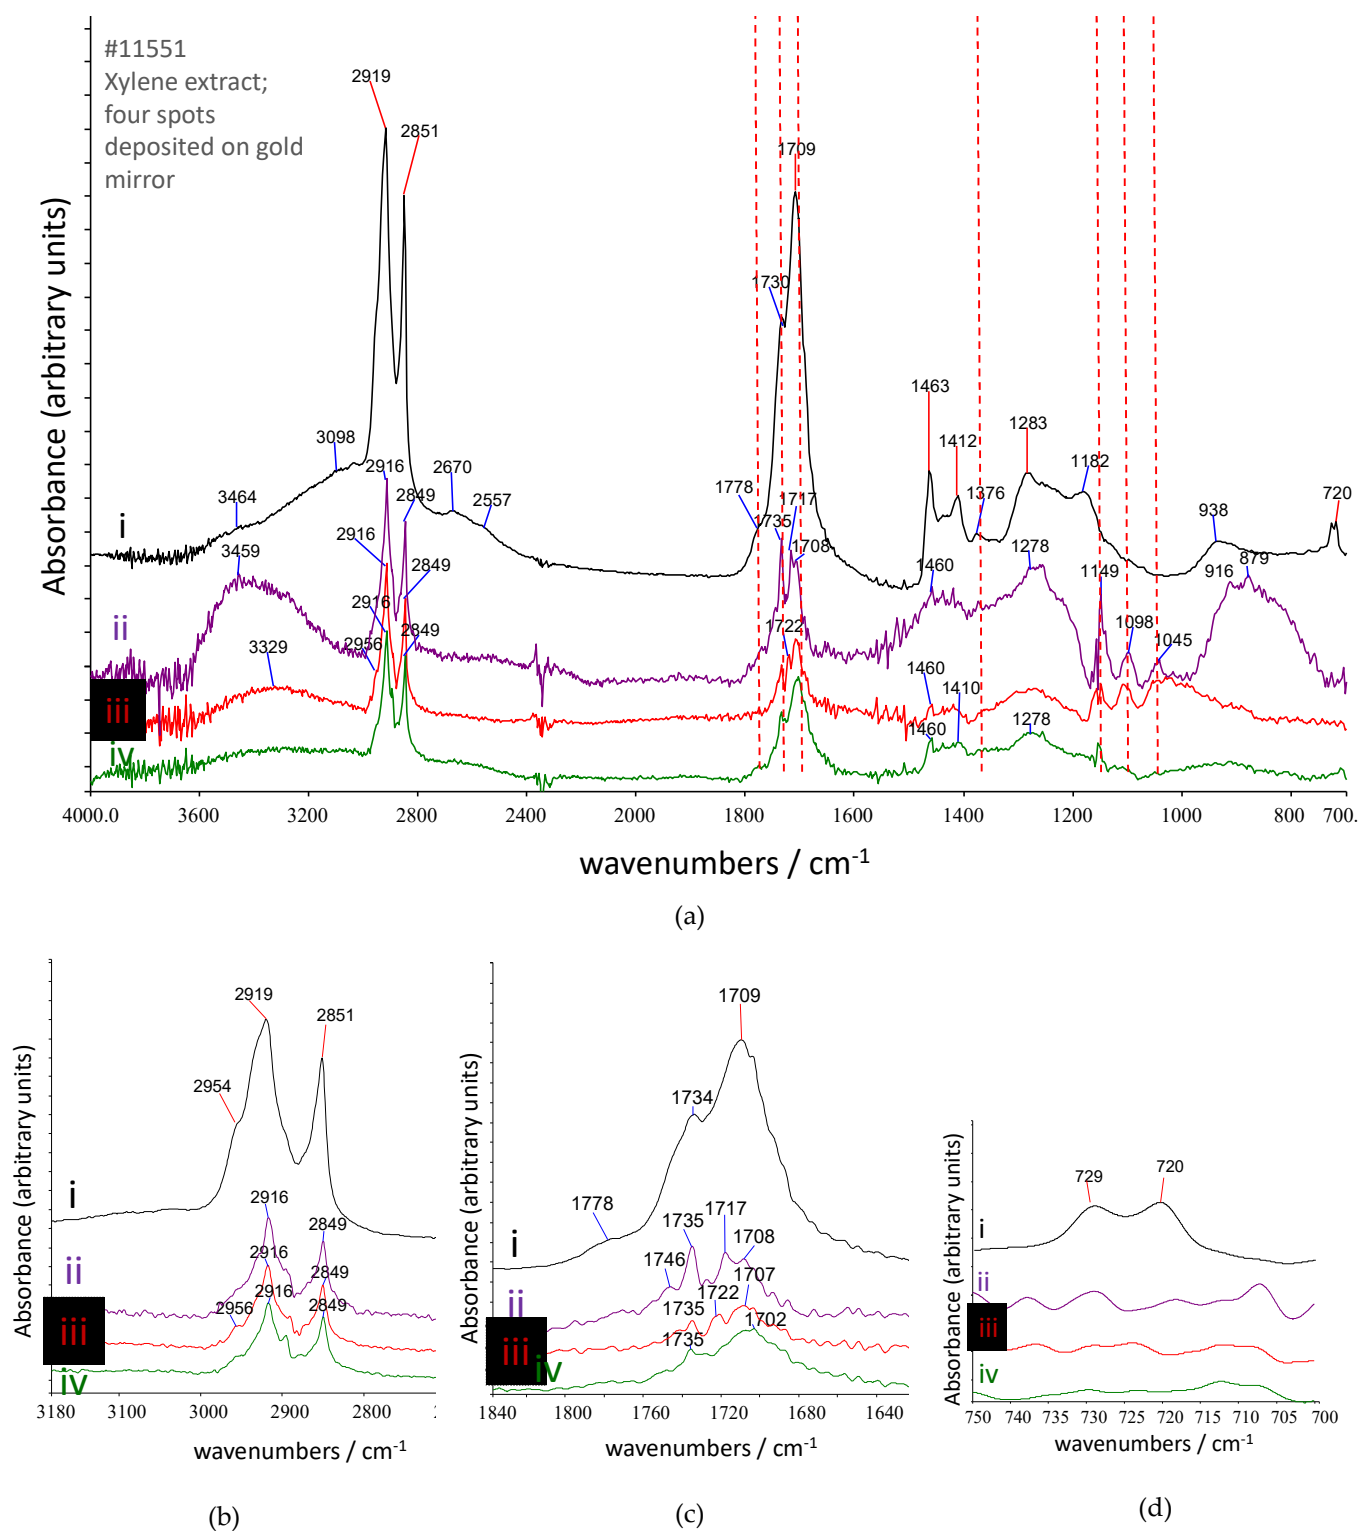

**Figure S4.** Microscopy FTIR spectra of sample #11551 extracted from xylene and deposited on gold mirror disc; spectra (i)–(iv) correspond to four different micro-separated spots on the disc; (a) full spectra; (b) the C-H stretching region, (c) carbonyl region, and (d) methylene rocking region.

## 2. Gas chromatograms (Figure S5)

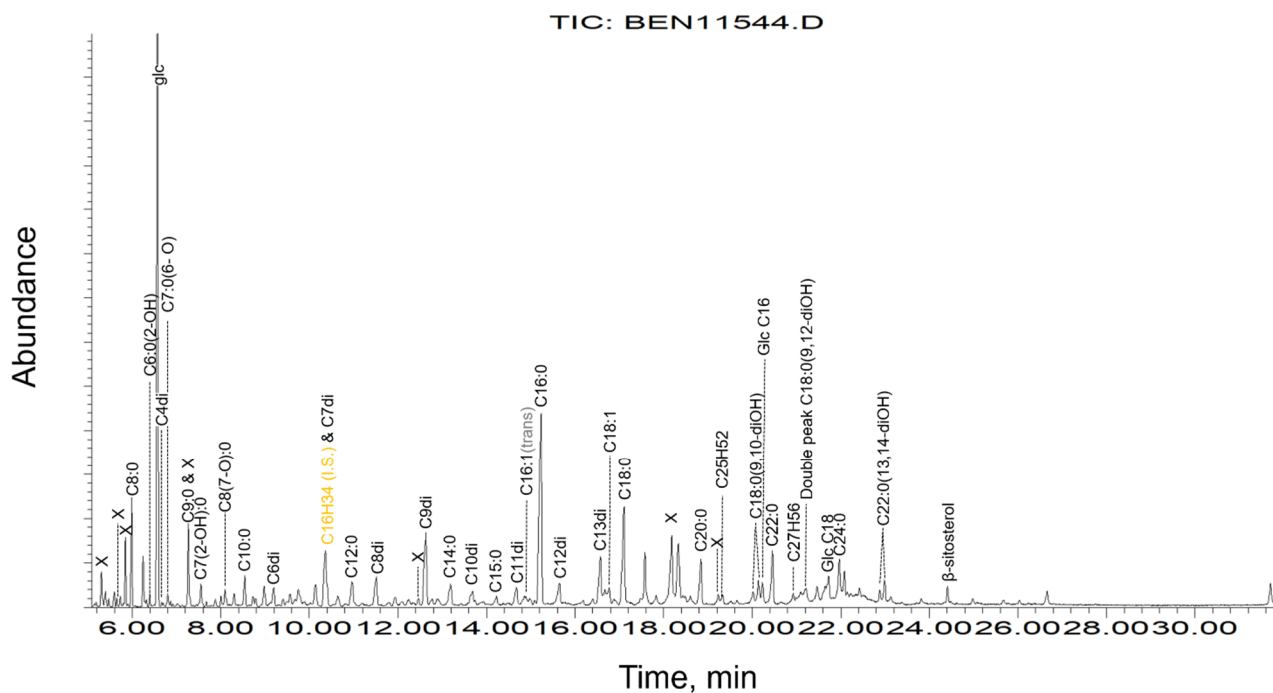

(a) sample #11544

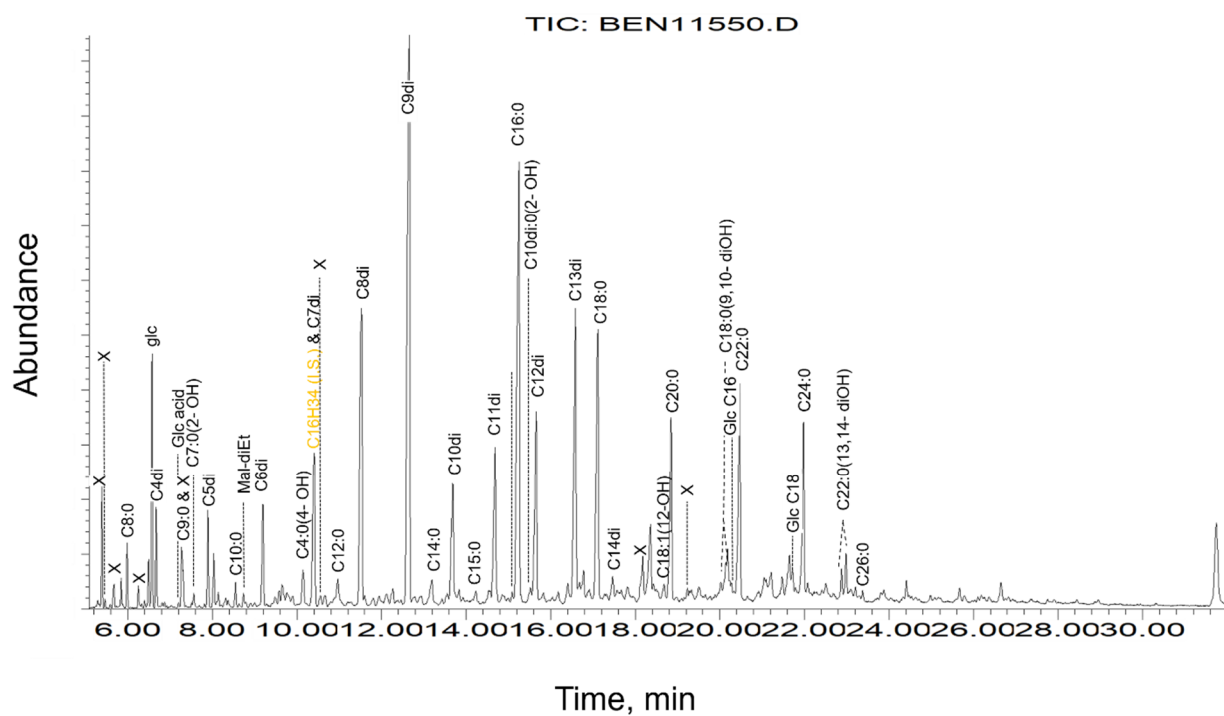

(b) sample #11550

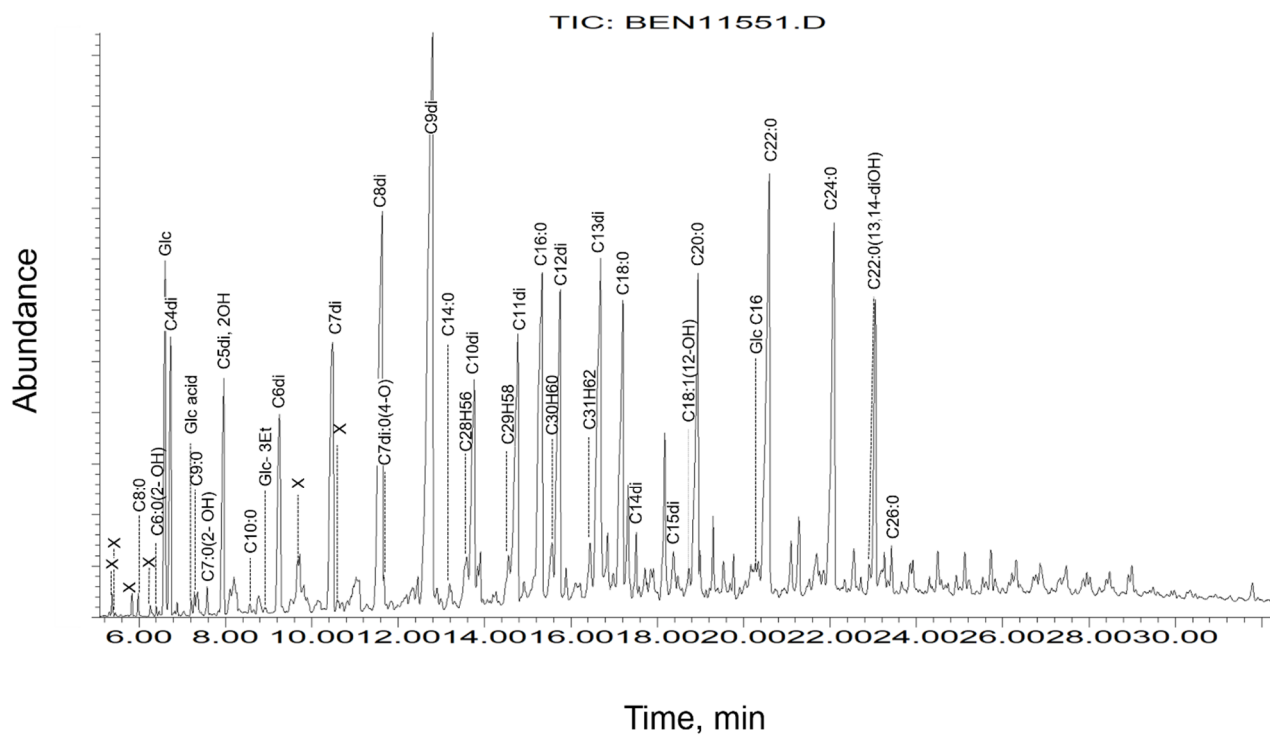

(c) sample #11551

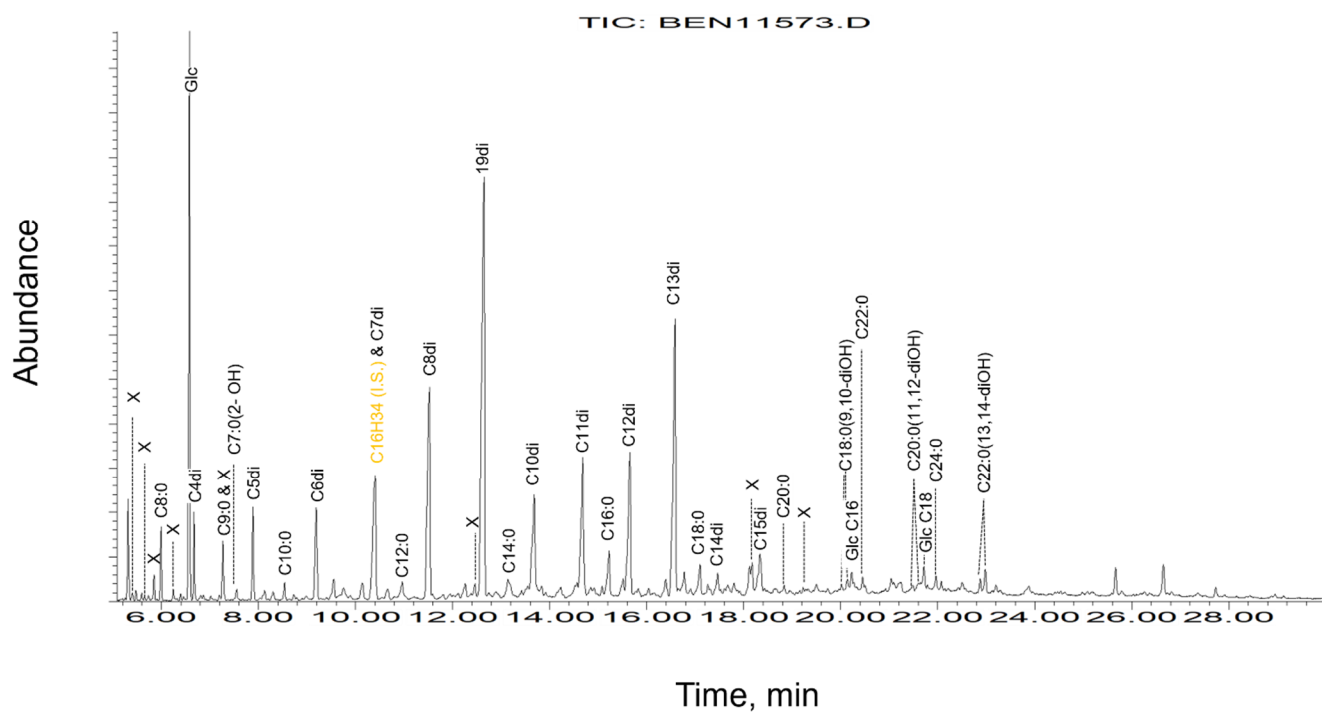

(d) sample #11573

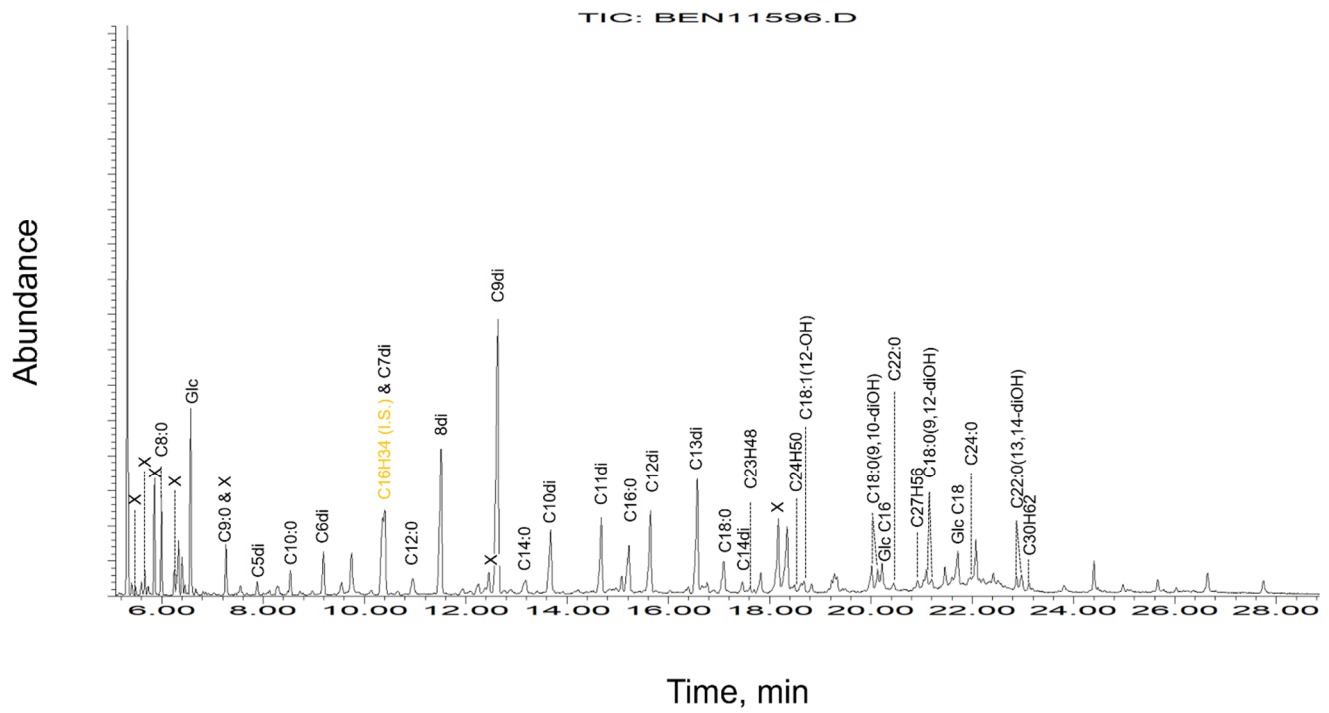

(e) sample #11596

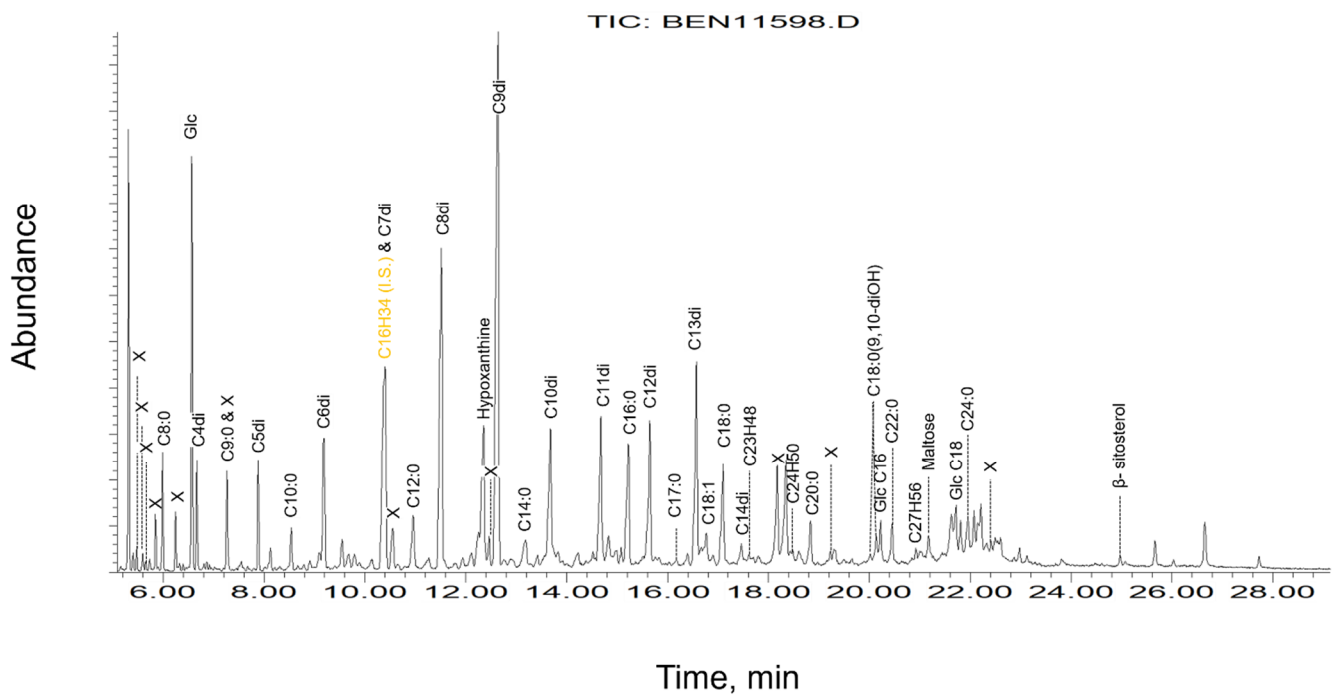

(f) sample #11598



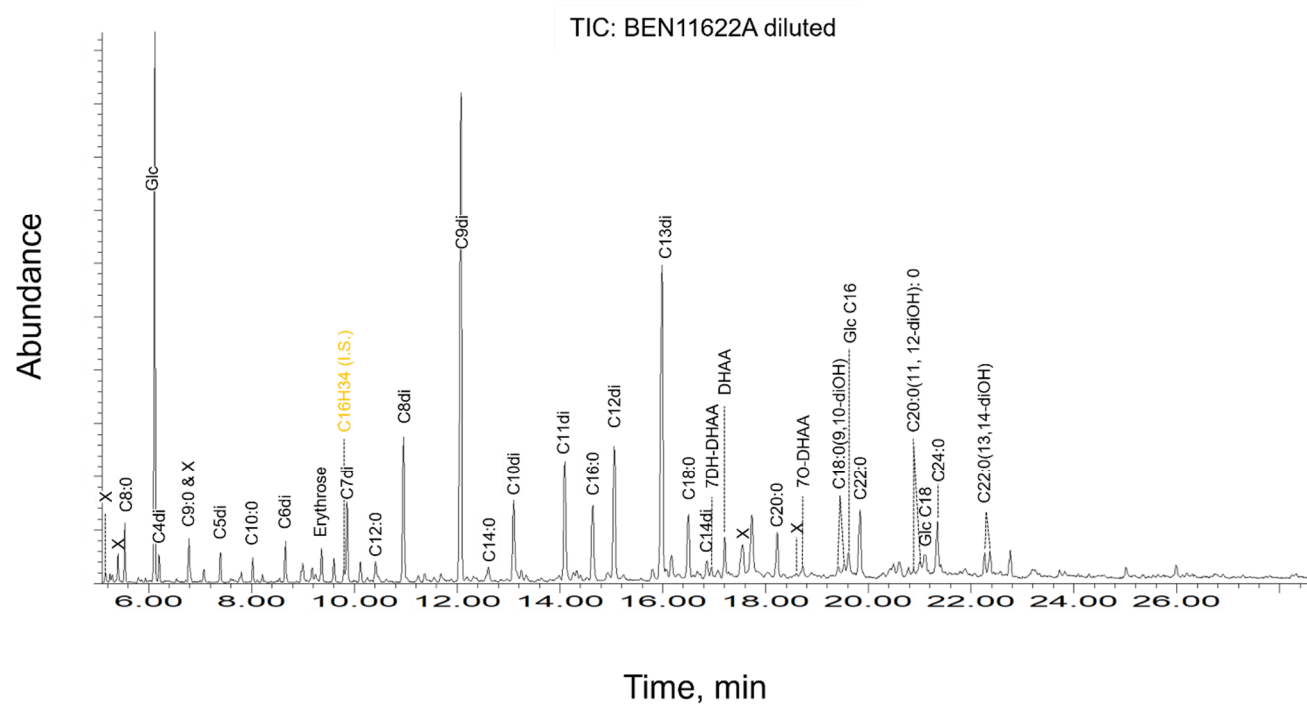

(g) sample #11622A

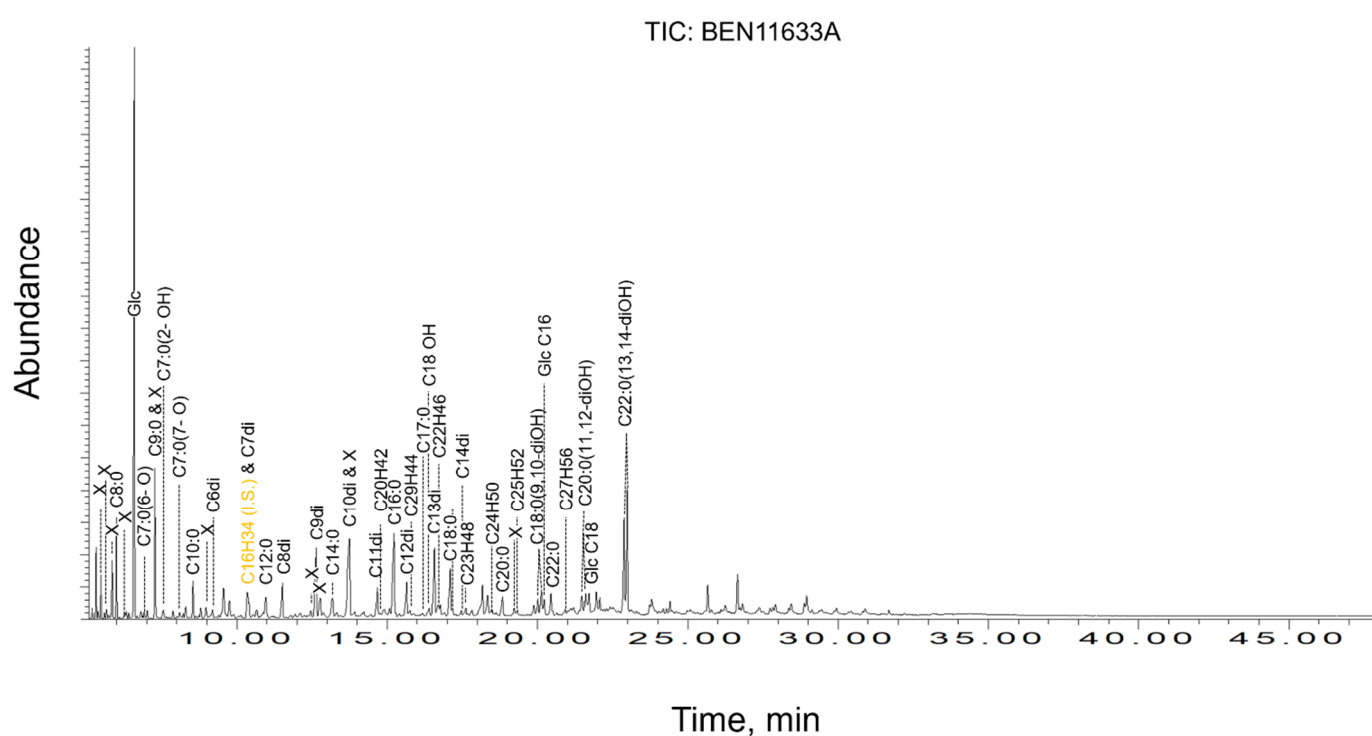

(h) sample #11633A

**Figure S5. (a–h):** Partial total ion gas chromatograms of all samples with main identified components; For a key of abbreviated analytes, see Table S1. IS: Hexadecane (internal standard, see Materials and Methods in main text); x: unknown.

3. Table S1. Organic compounds with relative integration areas detected in the various samples through gas chromatography-mass spectrometry.

| retention time<br>(t <sub>R</sub> , min) | Compound<br>(abbreviation) <sup>1</sup> | Compound (full name) <sup>1</sup> | Lamp               | Lamp               | Lamp               | Small bowl         | Small bowl         | Spouted bowl       | Pedestalled bowl    | Pedestalled bowl     |
|------------------------------------------|-----------------------------------------|-----------------------------------|--------------------|--------------------|--------------------|--------------------|--------------------|--------------------|---------------------|----------------------|
|                                          |                                         |                                   | #11544<br>(1.1 mg) | #11550<br>(2.5 mg) | #11551<br>(9.5 mg) | #11573<br>(2.0 mg) | #11596<br>(1.8 mg) | #11598<br>(2.0 mg) | #11622A<br>(1.4 mg) | #11633A<br>(13.5 mg) |
| 6.00                                     | C8:0                                    | Octanoic (caprylic) acid          | 2.60               | 0.74               | 0.13               | 1.33               | 2.33               | 1.33               | 0.99                | 2.59                 |
| 6.40                                     | C6:0(2-OH)                              | 2-hydroxy-hexanoic acid           | 0.35               |                    | 0.05               |                    |                    |                    |                     |                      |
| 6.60                                     | Glc                                     | Glycerol                          | 20.49              | 2.99               | 2.59               | 11.93              | 4.80               | 5.15               | 10.10               | 17.41                |
| 6.70                                     | C4diCOOH                                | Butanedioic (succinic) acid       | 0.10               | 1.11               | 2.28               | 1.55               |                    | 1.26               | 0.45                |                      |
| 6.80                                     | C7(6-O):0                               | 6-oxo-heptanoic acid              | 0.44               |                    |                    |                    |                    |                    |                     | 0.34                 |
| 7.20                                     | Glc acid                                | Glyceric acid                     |                    | 0.07               | 0.10               |                    |                    |                    |                     |                      |
| 7.30                                     | C9:0                                    | Nonanoic (pelargonic) acid        | 2.55               | 1.17               | 0.14               | 1.35               | 1.56               | 1.39               | 1.01                | 4.62                 |
| 7.60                                     | C7(2-OH):0                              | 2-hydroxy-heptanoic acid          | 0.93               | 0.21               | 0.19               |                    |                    |                    |                     | 0.48                 |
| 7.90                                     | C5diCOOH                                | Pentanedioic (glutaric) acid acid |                    | 1.21               |                    | 2.04               | 0.42               | 1.46               | 0.65                |                      |
| 7.96                                     | C5di, 3Et                               | 3-ethyl-glutaric acid             |                    | 0.19               |                    |                    |                    |                    |                     |                      |
| 8.00                                     | C5di, 2OH                               | 2-hydroxy-glutaric acid           |                    |                    | 2.32               |                    |                    |                    |                     |                      |
| 8.10                                     | C8(7-O):0                               | 7-oxo-octanoic acid               | 0.65               |                    |                    |                    |                    |                    |                     | 0.30                 |
| 8.50                                     | C10:0                                   | Decanoic (capric) acid            | 1.13               | 0.33               | 0.09               | 0.49               | 0.93               | 0.72               | 0.48                | 1.31                 |
| 9.20                                     | C6diCOOH                                | Hexanedioic (adipic) acid         | 0.79               | 1.81               | 2.74               | 3.01               | 1.75               | 2.67               | 0.87                | 0.59                 |
| 9.40                                     | Erythrose                               | Erythrose                         |                    |                    |                    |                    |                    |                    | 0.85                |                      |
| 10.30                                    | C16H34 (I.S.)                           | Hexadecane (I.S.)                 | 3.13               | 0.35               |                    | 4.10               | 5.35               | 5.36               | 0.30                | 1.66                 |
| 10.40                                    | C7diCOOH                                | Heptanedioic (pimelic) acid       | 0.58               | 3.35               | 4.43               | 2.03               | 1.50               | 2.01               | 2.03                | 0.51                 |
| 11.00                                    | C12:0                                   | C12:0 Dodecanoic (lauric) acid    | 1.45               | 0.77               |                    | 0.67               | 1.05               | 1.44               | 0.66                | 1.43                 |
| 11.50                                    | C8diCOOH                                | Octanedioic (suberic) acid        | 1.61               | 7.59               | 7.66               | 9.47               | 7.07               | 8.62               | 4.19                | 1.80                 |
| 11.60                                    | C7di (4-O)                              | 4-oxo-heptanedioic acid           |                    |                    | 0.17               |                    |                    |                    |                     |                      |
| 12.60                                    | C9diCOOH                                | Nonanedioic (azelaic) acid        | 4.30               | 15.56              | 13.67              | 20.21              | 14.23              | 14.78              | 15.07               | 3.84                 |
| 13.20                                    | C14:0                                   | Tetradecanoic (myristic) acid     | 1.27               | 0.79               | 0.06               | 1.12               | 1.02               | 1.12               | 0.58                | 1.61                 |

|       |                  |                                                |       |       |      |       |      |      |       |      |
|-------|------------------|------------------------------------------------|-------|-------|------|-------|------|------|-------|------|
| 13.70 | C10diCOOH        | Decanedioic (sebacic) acid                     | 0.78  | 2.98  | 3.37 | 4.23  | 3.32 | 4.59 | 2.86  | 7.07 |
| 14.20 | C15:0            | Pentadecanoic acid                             | 0.70  | 0.22  |      |       |      |      |       |      |
| 14.70 | C11diCOOH        | Undecanedioic acid                             | 1.05  | 3.73  | 4.39 | 5.82  | 3.39 | 3.79 | 4.02  | 1.69 |
| 14.90 | C16:1(trans)     | trans-hexadec-9-enoic (trans-palmitoleic) acid | 0.35  |       |      |       |      |      |       |      |
| 15.20 | C16:0            | Hexadecanoic acid (palmitic) acid              | 11.10 | 11.23 | 6.01 | 2.00  | 2.79 | 3.17 | 2.86  | 5.55 |
| 15.50 | C10di (2-OH)     | 2-hydroxy-decanedioic acid                     |       | 0.36  |      |       |      |      |       |      |
| 15.70 | C12diCOOH        | Dodecanedioic acid                             | 1.23  | 4.43  | 4.54 | 5.89  | 3.75 | 3.49 | 4.48  | 2.04 |
| 15.80 | C29H60           | Nonacosane                                     |       |       |      |       |      |      |       | 0.27 |
| 16.20 | C17:0            | Heptadecanoic acid                             |       |       | 0.09 |       |      | 0.17 |       | 0.16 |
| 16.40 | C18OH            | Octadecanol                                    |       |       |      |       |      |      |       | 0.57 |
| 16.60 | C13diCOOH        | Tridecanedioic acid                            | 2.65  | 6.76  | 5.90 | 11.01 | 4.01 | 4.81 | 11.00 | 3.69 |
| 16.70 | C22H46           | Docosane                                       |       |       |      |       |      |      |       | 0.76 |
| 16.80 | C18:1            | cis-Octadec-9-enoic (oleic) acid               | 0.61  | 0.37  |      |       |      | 1.02 |       |      |
| 17.00 | DH6-DHAA         | 6-dehydro-dehydroabietic acid                  |       |       |      |       |      |      | 0.25  |      |
| 17.10 | C18:0            | Octadecanoic (stearic) acid                    | 5.31  | 6.23  | 4.25 | 1.20  | 1.73 | 2.56 | 2.12  | 2.93 |
| 17.20 | DHAA             | Dehydroabietic acid                            |       |       |      |       |      |      | 1.22  |      |
| 17.50 | C14diCOOH        | Tetradecanedioic acid                          |       | 0.50  | 0.56 | 0.80  | 0.56 | 0.63 | 0.59  | 0.22 |
| 17.60 | C23H48?          | Tricosane?                                     |       |       |      |       | 0.21 | 0.21 |       | 0.40 |
| 18.40 | C15diCOOH        | Pentadecanedioic acid                          |       |       | 0.69 | 1.80  |      |      | 2.29  | 1.44 |
| 18.50 | C24H50           | Tetracosane                                    |       |       |      |       | 0.27 | 0.24 |       | 0.36 |
| 18.60 | Glc, C14?        | Myristoyl-glycerol?                            |       |       |      |       |      |      |       | 0.18 |
| 18.70 | 7O-DHAA          | 7-oxo-dehydroabietic acid                      |       |       |      |       |      |      | 0.46  |      |
| 18.70 | C18(12-OH):1     | 12-hydroxy-oleic (ricinoleic) acid             |       | 0.33  | 0.39 |       | 0.44 |      |       |      |
| 18.80 | C20:0            | Eicosanoic (arachidic) acid                    | 2.26  | 3.69  | 4.48 | 0.23  |      | 1.04 | 1.45  | 1.10 |
| 19.30 | C25H52           | Pentacosane                                    | 0.47  |       |      |       |      |      |       | 0.30 |
| 20.10 | C18(9,10-diOH):0 | 9,10-dihydroxy-stearic acid                    | 1.60  | 0.58  |      | 0.42  | 2.30 | 0.77 | 0.56  | 2.38 |

|       |                     |                                  |      |      |      |      |      |      |       |      |
|-------|---------------------|----------------------------------|------|------|------|------|------|------|-------|------|
| 20.20 | Glc, C16            | Palmitoyl-glycerol               | 0.81 | 0.89 | 0.29 | 0.36 | 1.20 | 0.78 | 0.78  | 0.78 |
| 20.40 | C22:0               | Docosanoic (behenic) acid        | 2.61 | 4.61 | 7.57 | 0.29 | 0.52 | 0.49 | 0.33  | 1.07 |
| 20.92 | C27H56              | heptacosane                      | 0.22 |      |      |      | 0.42 | 0.23 |       | 0.38 |
| 21.10 | C18(9,12-diOH):0    | 9,12-dihydroxy-octadecanoic acid | 0.97 |      |      |      | 1.72 |      |       |      |
| 21.50 | C20 11,12diOH       | 11,12-dihydroxy-eicosanoic acid  |      |      |      | 0.55 |      |      | 1.44  | 2.44 |
| 21.20 | Maltose             | Maltose                          |      |      |      |      |      | 0.53 |       |      |
| 21.70 | Glc, C18            | Stearoyl-glycerol                | 0.78 | 0.32 |      | 0.63 | 1.86 | 1.13 | 0.83  | 1.01 |
| 22.00 | C24:0               | Tetracosanoic acid               | 1.91 | 3.19 | 5.74 | 0.40 | 0.50 | 0.89 | 1.76  | 1.08 |
| 22.40 | C29H60              | Nonacosane                       | 0.32 |      |      |      |      |      |       |      |
| 22.90 | C22(13,14-diOH):0   | 13,14-dihydroxy-docosanoic acid  | 1.33 | 1.08 | 3.38 | 1.07 | 1.38 |      | 18.32 | 9.98 |
| 23.00 | C30H62              | Triacontane                      |      |      |      |      | 0.34 |      |       |      |
| 23.40 | C26:0               | Hexacosanoic acid                |      | 0.19 | 0.36 |      |      |      |       |      |
| 24.70 | C28:0               | Octacosanoic acid                |      |      | 0.09 |      |      |      |       |      |
| 25.00 | $\beta$ -Sitosterol | $\beta$ -Sitosterol              | 0.23 |      |      |      |      | 0.23 |       |      |

<sup>1</sup> a,b refer to isomers with the same molecular FW.
